# Supplementary material for: Synergy of adsorption and photosensitization of graphene oxide for improved removal of organic pollutants
Source: Royal Society of Chemistry journal article supplement (doi:10.1039/c7ra01244f), 2017-01-01
Supplement: c7ra01244f1.pdf [file c7ra01244f1.pdf]

## Electronic Supplementary Information

### Synergy of Adsorption and Photosensitization of Graphene Oxide for Improved Removal of Organic Pollutants

Chaobi Li,<sup>a</sup> Qiao Xu,<sup>a</sup> Shuxia Xu,<sup>a</sup> Xinfeng Zhang,<sup>\*a</sup> Xiandeng Hou<sup>b</sup> and Peng Wu,<sup>\*b</sup>

<sup>a</sup>*College of Materials and Chemistry & Chemical Engineering, Chengdu University of Technology, Chengdu 610059, China*

<sup>b</sup>*Analytical & Testing Center, Sichuan University, Chengdu 610064, China*

\*To whom correspondence should be addressed. E-mail: [wupeng@scu.edu.cn](mailto:wupeng@scu.edu.cn) (PW),  
[zhangxinfeng09@cdut.cn](mailto:zhangxinfeng09@cdut.cn) (XZ)

## Contents

|                                                                                      |      |
|--------------------------------------------------------------------------------------|------|
| <b>1. Experimental Section</b> .....                                                 | S-3  |
| 1.1 Chemicals.....                                                                   | S-3  |
| 1.2 Apparatus.....                                                                   | S-3  |
| 1.3 Adsorption procedures.....                                                       | S-3  |
| 1.4 Study of photosensitization property of GO.....                                  | S-4  |
| <b>2. Study on the adsorption of HQ by GO</b> .....                                  | S-4  |
| 2.1 Adsorption mechanism (Figure S1 and Table S1).....                               | S-5  |
| 2.2 Adsorption thermodynamics (Figure S2 and Table S2).....                          | S-6  |
| 2.3 Adsorption isotherms (Table S3).....                                             | S-7  |
| <b>3. Study on the photosensitized oxidation of HQ by GO</b> .....                   | S-8  |
| 3.1 Fluorescence lifetime of GO (Figure S3).....                                     | S-9  |
| 3.2 Effect of different scavenger concentrations (Figure S4).....                    | S-9  |
| 3.3 Optimization of conditions (Figure S5).....                                      | S-10 |
| <b>4. Stability and Reusability of GO</b> (Figure S6, Figure S7, and Figure S8)..... | S-10 |
| <b>5. Performance of pollutant removal in real samples</b> (Table S4).....           | S-12 |

## **1. Experimental Section**

### **1.1 Chemicals**

All the chemical reagents used in this study were at least of analytical grade. All solutions were prepared using  $18.2 \text{ M}\Omega \text{ cm}^{-1}$  deionized water (DIW) produced by a water purification system (Chengdu Ultrapure Technology Co., Ltd., China).  $1 \text{ mg mL}^{-1}$  graphene oxide (GO) stable suspension was daily prepared in DIW under sonication using a commercial GO powder purchased from Chengdu Organic Chemicals Co. Ltd. (Chengdu, China). Other reagents were purchased from Kelong Chemical Reagent Co. (Chengdu, China).

### **1.2 Apparatus**

Absorption spectra were recorded on a UV-5200PC UV-vis spectrophotometer (Shanghai Metash Instruments Co., Ltd.). Fluorescence measurements were performed on an Hitachi F-7000 spectrofluorometer equipped with a plotter unit and a quartz cell ( $1 \text{ cm} \times 1 \text{ cm}$ ). TEM characterization was performed with a Tecnai G2 F20 S-TWIN transmission electron microscope at an accelerating voltage of 200 kV (FEI Co., USA).

### **1.3 Adsorption procedures**

The HQ solutions for adsorption experiments were prepared via serial dilution of a HQ stock solution ( $1 \text{ mg mL}^{-1}$ ) to desired concentrations. And the GO suspension were diluted to the desired concentration with ultrapure water followed by GO stock solution ( $1 \text{ mg mL}^{-1}$ ). The adsorption studies were performed with batch equilibration method. Specifically,  $1 \text{ mL}$  GO ( $0.2 \text{ mg mL}^{-1}$ ) suspended was added to  $0.1 \text{ mL}$  of known concentration of HQ solution and  $0.9 \text{ mL}$  of phosphate buffered saline solution (PBS, pH, 7.0) in a  $2 \text{ mL}$  centrifugal tube and adsorption for  $1 \text{ h}$  at room temperature. Afterwards, centrifugated at  $10,000 \text{ rpm}$  for  $10 \text{ min}$ , and the concentrations of HQ in the liquid were analyzed by a UV-visible spectrophotometer at  $288 \text{ nm}$ . The amount of HQ adsorbed on GO was calculated from the following expression:

$$q_e = \frac{(C_0 - C_e)V}{m}$$

Where  $q_e$  was the amount adsorbed at equilibrium ( $\text{mg g}^{-1}$ )  $C_0$  and  $C_e$  were the initial and equilibrium concentration of HQ in solution ( $\text{mg L}^{-1}$ ), respectively.  $m$  was the dosage of sorbent (mg), and  $V$  was the volume of the solution (mL).

#### **1.4 Study of photosensitization property of GO**

The photosensitization experiments was evaluated by photodegradation of hydroquinone (HQ) aqueous solution irradiated by a white LED (3 W). Typically,  $0.2 \text{ mg mL}^{-1}$  of the GO suspension (1mL) was well dispersed in 0.9 mL PBS solution (pH 7.0) and 0.1 mL HQ with the concentration of  $50 \text{ mg L}^{-1}$  in the 24 well-plate. Subsequently, the mixed suspension was stirred for several minutes to obtain relatively uniformly dispersed between GO and HQ molecules in the dark. The above solution was irradiated with a white LED (3 W). At given time intervals, the supernatant was separated from the photosensitizer by centrifugation at 10,000 rpm for 10 min. Afterwards, 1.5 mL supernatant was sampled and analyzed the absorbance at 288 nm by a UV-visible spectrophotometer. The HQ was used as a process indicator in all the experiments unless otherwise specified.

## **2. Study on the adsorption of HQ by GO**

### **2.1 Adsorption mechanism**

To investigate the mechanism of the adsorption process, two conventional kinetic models (pseudo-first-order and pseudo-second-order) were applied to analyze the experimental data.

The pseudo-first-order model can be expressed as:

$$\ln (q_e - q_t) = \ln q_e - k_1 t$$

Where  $q_e$  and  $q_t$  are the adsorbed HQ amounts on GO at equilibrium and at various times  $t$  ( $\text{mg g}^{-1}$ ), respectively, and  $k_1$  is the rate constant of the pseudo-first-order model of

adsorption ( $\text{min}^{-1}$ ). The values of  $q_e$  and  $k_1$  can be determined from the intercept and slope of the linear plot of  $\ln (q_e - q_t)$  versus  $t$  (Fig. S1).

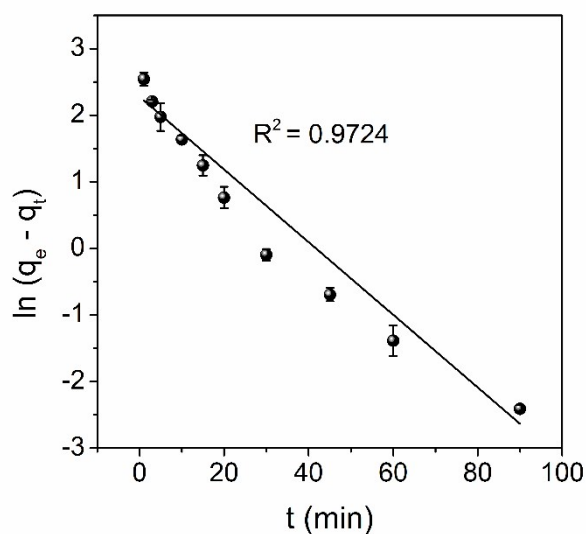

Figure S1. Fitting of the adsorption kinetics (Figure 2A) with pseudo-first-order model.

The pseudo-second-order model includes all the steps of adsorption including external film diffusion, adsorption, and internal particle diffusion, which is described as:

$$\frac{t}{q_t} = \frac{1}{k_2 q_e^2} + \frac{t}{q_e}$$

Where  $q_e$  and  $q_t$  are the the adsorption capacity ( $\text{mg g}^{-1}$ ) at equilibrium and at any time  $t$  (min), respectively,  $K_2$  is the rate constant of the pseudo-second-order model of adsorption ( $\text{g mg}^{-1} \text{min}^{-1}$ ). The values of  $q_e$  and  $K_2$  were determined from the slope and intercept of the plots of  $t/q_t$  against  $t$ . And the kinetic parameters and correlation coefficients for HQ adsorbed by GO are summarized in Table S1.

Table S1. Comparison of the pseudo-first and second-order kinetics models on removal of HQ by GO.

|                          | $q_{1e}$ ( $\text{mg g}^{-1}$ ) | $k_1$ ( $\text{min}^{-1}$ ) | $R^2$  |
|--------------------------|---------------------------------|-----------------------------|--------|
| Pseudo-first-order model | 9.757                           | 0.054                       | 0.9724 |

| Pseudo-second-order model | $q_{2e}$ (mg g <sup>-1</sup> ) | $k_2$ (g mg <sup>-1</sup> min <sup>-1</sup> ) | R <sup>2</sup> |
|---------------------------|--------------------------------|-----------------------------------------------|----------------|
|                           | 20.83                          | 0.017                                         | 0.9998         |

## 2.2 Adsorption thermodynamics

Temperature effect on adsorption of HQ on GO was carried out at four different temperatures, i.e., 288, 298, 308 and 318 K and shown in Fig. S2. The thermodynamic parameters such as standard free energy change ( $\Delta G^0$ ), enthalpy change ( $\Delta H^0$ ) and entropy change ( $\Delta S^0$ ) were determined based on the following equations:

$$K = \frac{C_s}{C_e}$$

$$\Delta G^0 = -RT \ln K$$

$$\Delta S^0 = -\frac{\Delta G^0 - \Delta H^0}{T}$$

Where K is the adsorption equilibrium constant,  $C_s$  is the amount of HQ adsorbed per mass of GO (mg g<sup>-1</sup>),  $C_e$  is the HQ concentration in solution at equilibrium (mg L<sup>-1</sup>), R is the universal gas constant (8.314 J mol<sup>-1</sup>·K<sup>-1</sup>), and T is the absolute temperature (K). The thermodynamic parameters calculated from the above eqs were listed in Table S2.

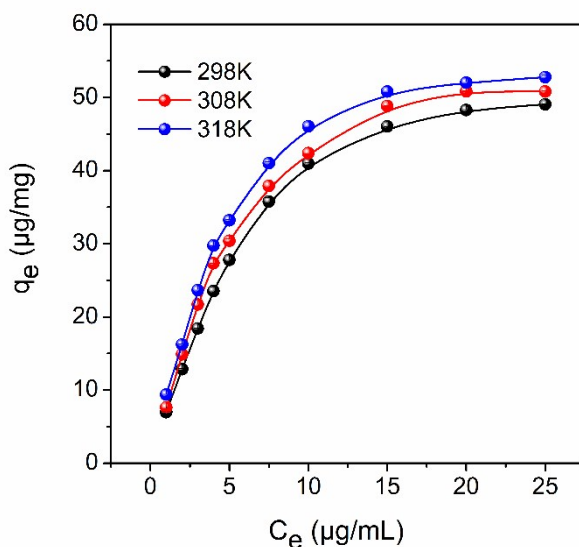

Figure S2. Temperature effect on HQ adsorbed by GO.

Table S2. Thermodynamic parameters for HQ adsorbed by GO.

| Thermodynamic constant                                   | Temperature (K) |       |       |
|----------------------------------------------------------|-----------------|-------|-------|
|                                                          | 298K            | 308K  | 318K  |
| K                                                        | 18.42           | 17.47 | 28.56 |
| $\Delta G^\circ$ (kJ mol <sup>-1</sup> )                 | -7.23           | -7.32 | -8.86 |
| $\Delta H^\circ$ (kJ mol <sup>-1</sup> )                 | 12.54           |       |       |
| $\Delta S^\circ$ (kJ mol <sup>-1</sup> K <sup>-1</sup> ) | 0.07            |       |       |

### 2.3 Adsorption isotherms

To further investigate the mechanism of equilibrium adsorption, the results were subjected to Langmuir and Freundlich isothermal models for simulation. The Langmuir model assumes that adsorption occurs on a homogeneous surface by monolayer coverage and no subsequent interaction between adsorbed species. The equation is as follows:

$$\frac{C_e}{q_e} = \frac{C_e}{q_{max}} + \frac{1}{q_{max}K_L}$$

where  $q_e$  is the adsorbed HQ amount per gram of GO (mg g<sup>-1</sup>),  $C_e$  represents the equilibrium concentration of HQ in solution (mg L<sup>-1</sup>),  $K_L$  is the Langmuir constant (L mg<sup>-1</sup>), which is related to the affinity of the binding sites, and  $q_{max}$  represents the maximum adsorption capacity of the adsorbent (mg g<sup>-1</sup>). The values of  $q_{max}$  and  $K_L$  are calculated from the slope and intercept of the linear plot of  $C_e/q_e$  against  $C_e$ .

The Freundlich model is an empirical model based on multilayer adsorption on heterogeneous surfaces. The equation is commonly described as:

$$\ln q_e = \ln K_F + \frac{1}{n} \ln C_e$$

where  $q_e$  and  $C_e$  are defined as in the Langmuir isotherm and  $K_F$  and  $n$  are the Freundlich constants that represent the adsorption capacity and adsorption strength, respectively.  $K_F$  and  $n$  can be obtained from the intercept and slope of the linear plot of  $\ln q_e$  versus  $\ln C_e$ . Moreover, the magnitude of  $1/n$  quantifies the favorability of adsorption and the degree of heterogeneity of the surface. If  $n > 1$ , suggesting favorable adsorption. The relative parameters calculated from the Langmuir and Freundlich models at three different temperatures were listed in Table S3.

Table S3. Parameters of the Freundlich and Langmuir adsorption isotherm models for HQ adsorbed by GO.

| T (K) | Freundlich |       |        | Langmuir  |        |        |
|-------|------------|-------|--------|-----------|--------|--------|
|       | n          | $K_F$ | $R^2$  | $q_{max}$ | $K_L$  | $R^2$  |
| 298   | 2.210      | 18.02 | 0.9138 | 54.82     | 0.4645 | 0.9996 |
| 308   | 2.550      | 19.81 | 0.8849 | 54.90     | 0.6945 | 0.9992 |
| 318   | 3.243      | 25.14 | 0.9440 | 55.55     | 1.1450 | 0.9987 |

### 3. Study on the photosensitized oxidation of HQ by GO

#### 3.1 Fluorescence lifetime of GO

The effect of irradiation time on fluorescence lifetime of GO was studied under different conditions and shown in Fig. S3. It can be seen that the fluorescence lifetime of GO decreases with the increase in illumination time from 0 to 60min. It validates that GO have the ultralow radiative transition, confirming that GO plays a key role for generating both sufficient singlet oxygen quantum yield, accompanying with minimized fluorescence.



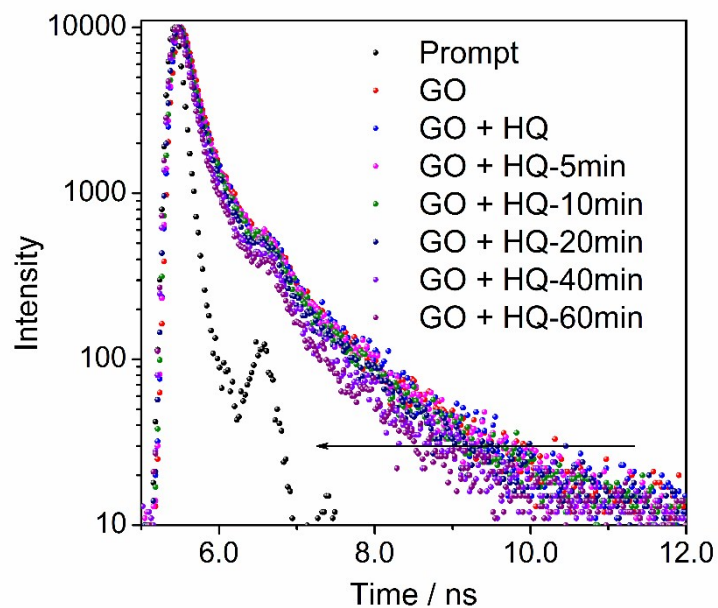

Figure S3. Time-dependent fluorescence lifetime quenching of GO ( $\lambda_{ex} = 350 \text{ nm}$ ) in the presence of HQ ( $2.5 \text{ mg L}^{-1}$ ). Experimental conditions: GO concentration,  $0.1 \text{ mg mL}^{-1}$ , sample pH 7.0, irradiating with white LED for 0-60 min.

### 3.2. Effect of different scavenger concentrations

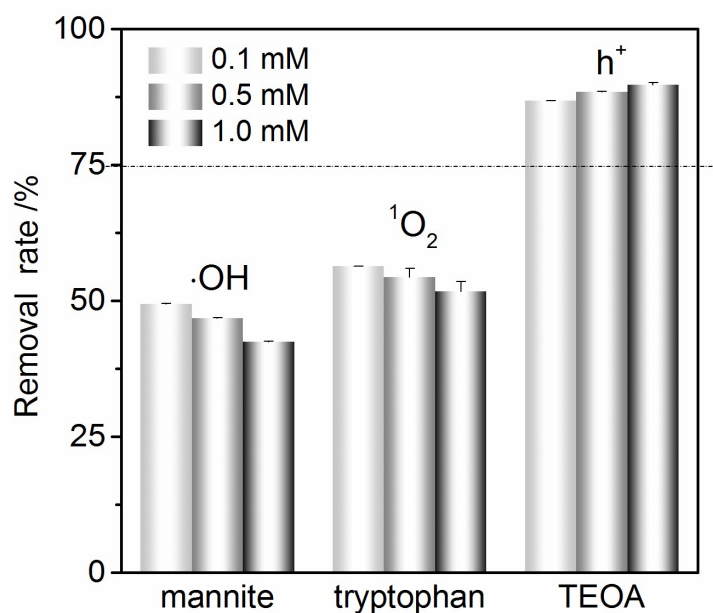

**Figure S4.** The removal rate of HQ by GO with the different scavenger concentrations. Experimental conditions: GO concentration,  $0.1 \text{ mg mL}^{-1}$ , HQ concentration,  $2.5 \text{ mg L}^{-1}$ , sample pH 7.0, irradiating with white LED time for 10 min.

### 3.3. Optimization of removal conditions

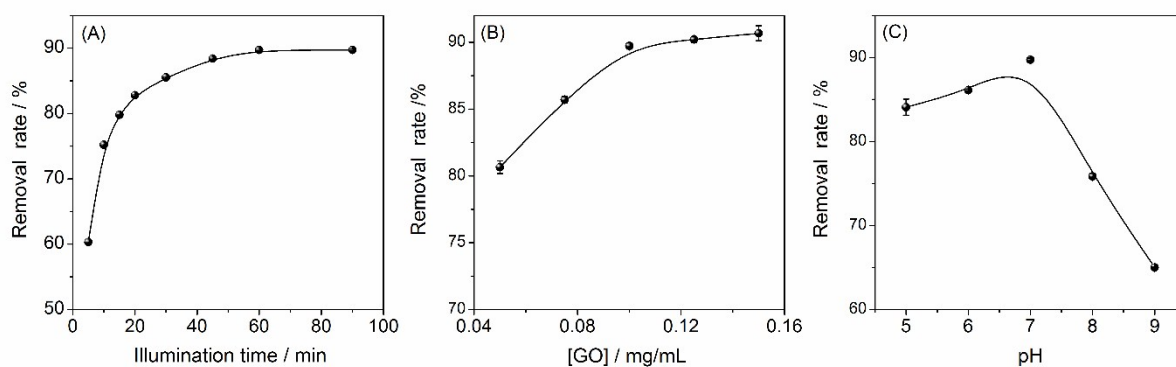

**Figure S5.** Factors that influence the removal rate of HQ by synergic adsorption and photosensitization of GO: (A) white LED illumination time; (B) the concentration of GO; and (C) sample pH. Experiments were carried out using  $0.1 \text{ mg mL}^{-1}$  GO and  $2.5 \text{ mg L}^{-1}$  HQ in PBS buffer (pH, 7.0) with a white LED illumination for 60 min unless otherwise stated.

### 4. Stability and Reusability of GO

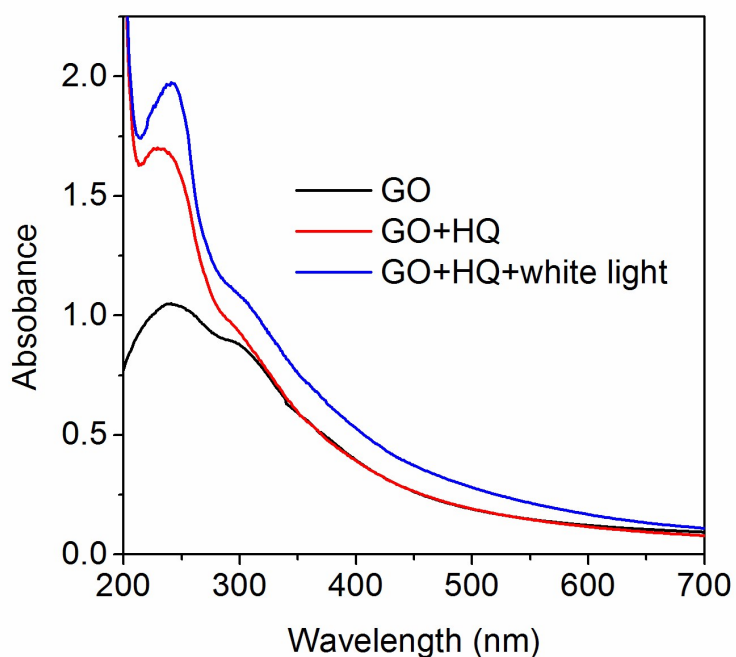

**Figure S6.** UV-Vis absorption spectra of GO before and after interaction with HQ.

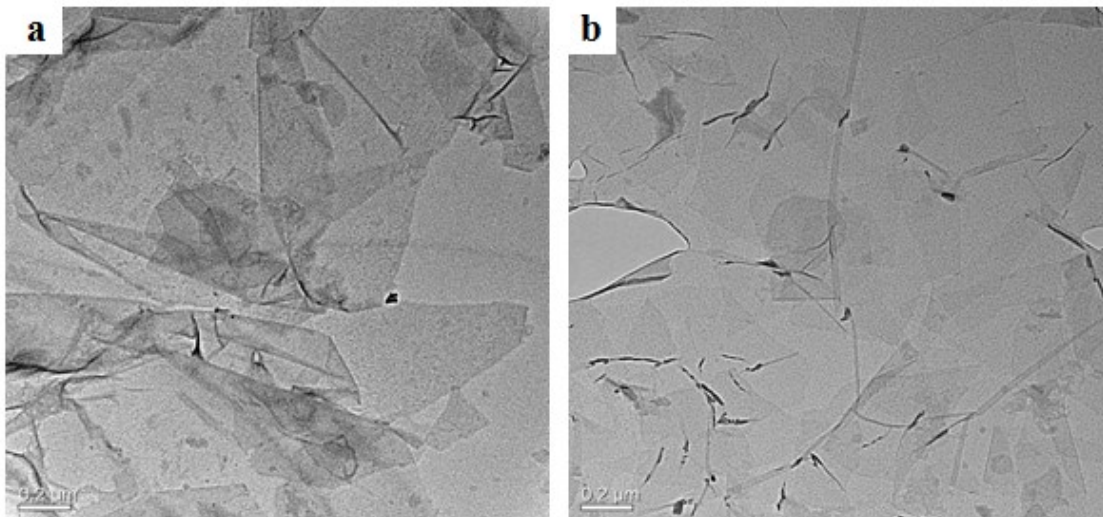

**Figure S7.** TEM images of GO nanosheets before (a) and after HQ adsorption (b).

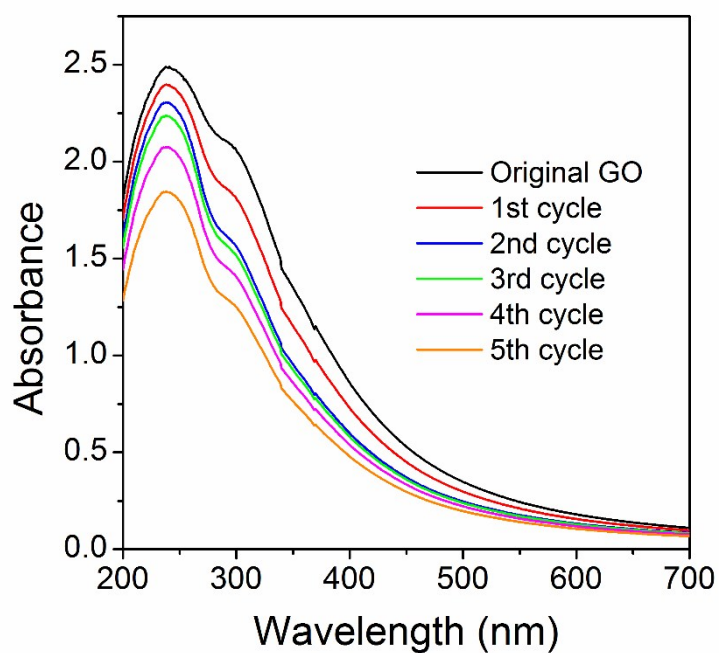

**Figure S8.** The amount of GO suspension after several cycling. Experimental conditions: GO concentration,  $0.1 \text{ mg mL}^{-1}$ ; HQ concentration,  $2.5 \text{ mg L}^{-1}$ ; sample pH 7.0; irradiating with white LED for 60 min; elution was carried out with 2 mL deionized water.

## 5. Performance of pollutant removal in real samples

Table S4. Pollutant (0.5 mg/L) removal performance of GO via synergic adsorption and photosensitization in real-world samples.

| Sample matrix | Pollutants | Removal rate (%) |
|---------------|------------|------------------|
| Tap water     | PE         | 100.0 ± 0.2      |
|               | HQ         | 100.0 ± 0.2      |
|               | PCP        | 100.0 ± 0.2      |
| Lake water    | PE         | 98.2 ± 0.1       |
|               | HQ         | 98.6 ± 0.1       |
|               | PCP        | 97.4 ± 0.4       |
| River water   | PE         | 95.8 ± 0.2       |
|               | HQ         | 96.2 ± 0.1       |
|               | PCP        | 96.1 ± 0.2       |
